# Supplementary material for: Variation in the Antimicrobial Activity of Essential Oils from Cultivars of Lavandula angustifolia and L. × intermedia
Source: MDPI journal article supplement (doi:10.3390/agronomy12122955), 2022-11-25
Supplement: s1 [file s1]

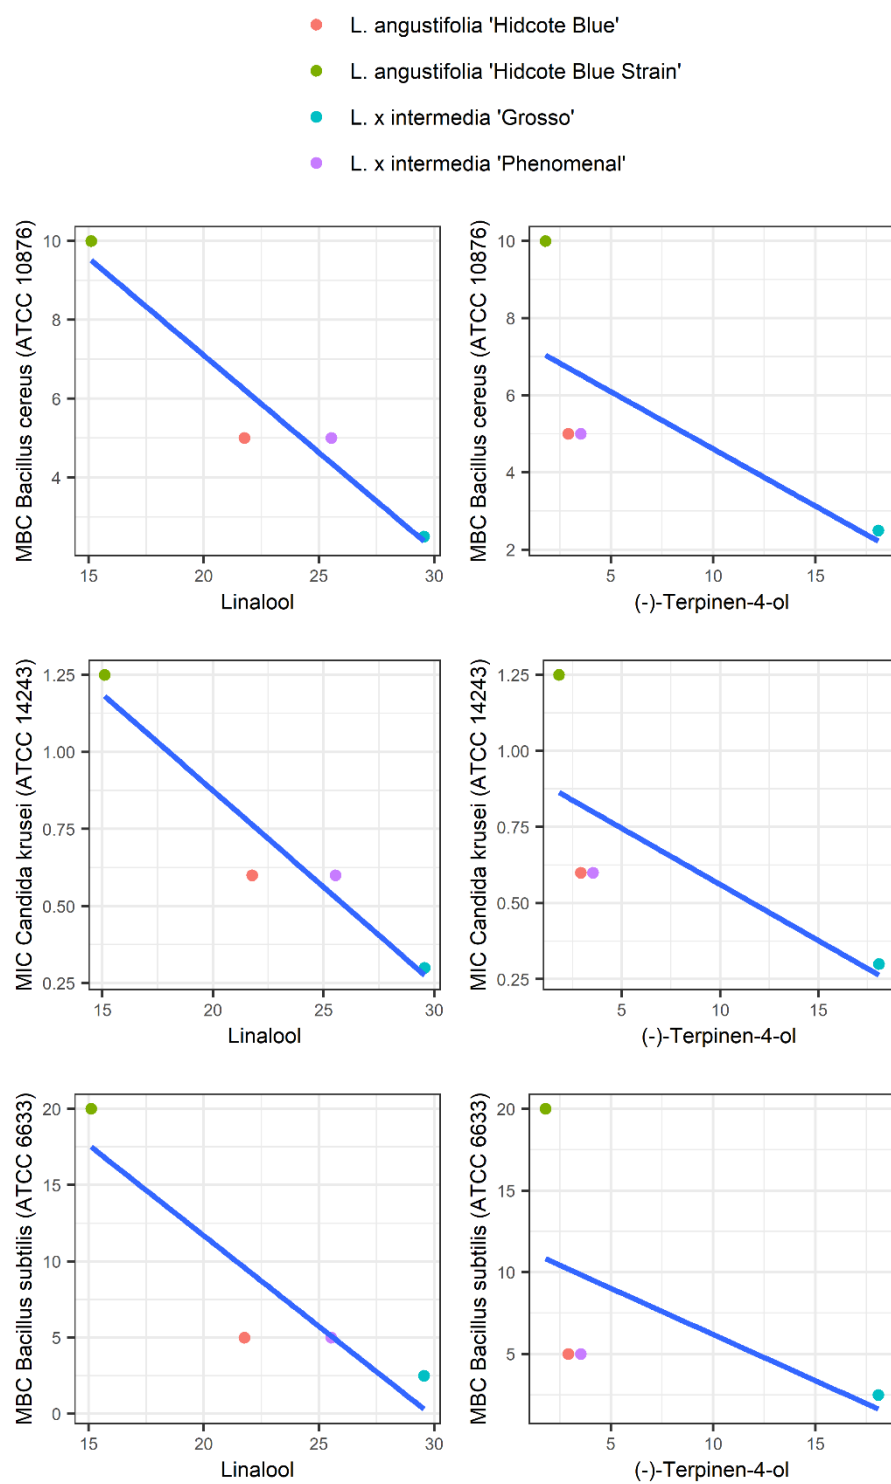

**Figure S1.** Plots illustrating selected correlations. Blue lines indicate the trend line (fitting line of the simple linear regression model).
